# Supplementary material for: Molecular rods based on a ruthenium(ii) macrocyclic bis(acetylide) building block
Source: Royal Society of Chemistry journal article supplement (doi:10.1039/b002674n), 2000-01-01
Supplement: b002674n.doc [file b002674n.doc]

**Supplementary Information**

**Molecular Rods based on a Ruthenium(II) Macrocyclic Bis(acetylide) Building Block**

**Mei-Yuk Choi, Michael C. W. Chan, Shie-Ming Peng,§ Kung-Kai Cheung and Chi-Ming Che***

*Department of Chemistry, The University of Hong Kong, Pokfulam Road, Hong Kong SAR, China. Email: cmche@hku.hk*

**§** *Department of Chemistry, National Taiwan University, Taipei, Taiwan*

**Experimental.** Satisfactory elemental analyses were obtained for all new complexes.

*trans*-Ru(16-TMC)(CCpy-4)2 (**Ru**): Sodium metal (0.05 g, 2.2 mmol) was added to a solution of 4-ethynylpyridine (0.05 g, 0.50 mmol) in methanol (20 cm3), and the mixture was stirred until all the sodium was consumed. [Ru(16-TMC)Cl2]Cl (0.10 g, 0.02 mmol) and zinc amalgam were added, and this mixture was heated at reflux for 1 h to yield a yellow precipitate. Upon cooling to room temperature, the resultant solid was collected and dissolved in a minimum amount of dichloromethane. Slow diffusion of *n*-hexane into this solution afforded bright yellow crystals (yield 56 %). 1H NMR (CD2Cl2): 1.33–1.36, 1.63–2.24 (m, 16H, CH2), 2.57 (s, 12H, NCH3), 3.56–4.40 (m, 8H, CH2), 7.18 (d, 3*J*HH = 6.1 Hz, 4H, *o*-py), 8.30 (d, 3*J*(H,H) = 6.1 Hz, 4H, *m*-py); 13C NMR (CD2Cl2): 21.6, 21.9 (NCH2*C*H2), 49.5 (NCH3), 60.3, 67.9 (NCH2), 110.0 (C), 124.9, 138.0, 148.9 (py), C not resolved; IR (cm–1, Nujol): 1990 (CC); Raman (cm–1): 2031 cm–1 (CC); FAB-MS (*m/z*): 590 [*M*+].

[{Re(N-N)(CO)3}2**-{(4-pyCC)2Ru(16-TMC)}](OTf)2 (***a–c*Re2Ru**): A solution of [Re(N-N)(CO)3MeCN]OTf (1.7 mmol) and **Ru** (0.50 g, 0.85 mmol) in THF (20 cm3) was refluxed for 12 h to afford a dark red precipitate. Upon cooling, the red solid was collected and washed with THF and diethyl ether. Recrystallisation by diffusion of diethyl ether into an acetonitrile solution afforded red needle-shaped crystals. (In the 13C{1H} NMR spectra, multiple resonances for the flexible propylene groups of 16-TMC are observed; the listed peaks are the most intense. The pyridyl carbons are not resolved, while C is apparently obscured by CD3*C*N.)

***a*Re2Ru**: N-N = bpy (yield 51 %); 1H NMR (CD3CN): 1.10–1.80 (m, 16H, CH2), 2.20 (s, 12H, NCH3), 3.15–3.60 (m, 8H, CH2), 6.55 (br d, 4H, py), 7.80 (t, *J*HH = 6.6 Hz, 4H, bpy), 8.22 (br d, 4H, py), 8.29, 8.43, 9.26 (t, d, d respectively, *J*HH = 7.9, 8.2, 5.4 Hz resp., 12H, bpy); 13C NMR (CD3CN): 21.5, 21.9 (NCH2*C*H2), 51.9 (NCH3), 60.4, 68.2 (NCH2), 125.7, 129.7, 142.0, 150.9, 154.8 (bpy), 156.7 (C), 192.9, 197.2 (CO); IR (cm–1, Nujol): 2029 (CC); 1973, 1903 (CO); Raman (cm–1): 2024 (CC); ES-MS (*m/z*): 1591 [*M* + OTf]+, 721 [*M*]2+.

***b*Re2Ru**: N-N = 4,4’-tBu2bpy (yield 57 %); 1H NMR (CD3CN): 1.17–1.75 (m, 25H, CH2 and tBu), 2.17 (s, 12H, NCH3), 3.10–3.92 (m, 8H, CH2), 6.81 (br d, 4H, py), 7.79 (d, *J*HH = 5.9 Hz, 4H, tBu2bpy), 7.96 (br d, 4H, py), 8.40, 9.10 (d, d, *J*HH = 1.8, 5.9 Hz resp., 8H, tBu2bpy); 13C NMR (CD3CN): 22.0, 22.2 (NCH2*C*H2), 30.4 (C*Me3*), 36.9 (*C*Me3), 51.2 (NCH3), 60.9, 68.7 (NCH2), 123.0, 126.7, 151.1, 154.3, 167.1 (tBu2bpy), 156.6 (C), 193.5, 197.4 (CO); IR (cm–1, Nujol): 2028 (CC); 1975, 1908 (CO); Raman (cm–1): 2012 (CC); ES-MS (*m/z*): 1815 [*M* + OTf]+, 834 [*M*]2+.

***c*Re2Ru**: N-N = phen (yield 52 %); 1H NMR (CD3CN): 1.13, 1.53–1.79 (m, 16H, CH2), 2.23 (s, 12H, NCH3), 3.10–3.88 (m, 8H, CH2), 6.78, 7.78 (d, d, *J*HH = 6.9, 6.9 Hz resp., 8H, py), 8.08 (dd, *J*HH = 8.3, 5.1 Hz, 4H, phen), 8.16 (s, 4H, phen), 8.83, 9.59 (d, d, *J*HH = 8.3, 5.1 Hz resp., 8H, phen); 13C NMR (CD3CN): 22.1, 22.3 (NCH2*C*H2), 50.5 (NCH3), 61.1, 68.8 (NCH2), 128.1, 129.2, 132.3, 141.3, 147.6, 151.0 (phen), 155.4 (C), 193.0, 197.2 (CO); IR (cm–1, Nujol): 2030 (CC); 1973, 1906 (CO); Raman (cm–1): 2010 (CC); ES-MS (*m/z*): 1639 [*M* + OTf]+, 745 [*M*]2+.

UV–Vis Absorption and Electrochemical*x* Data in Acetonitrile at 298 K

| Complex | max, nm (, dm3 mol–1 cm–1) | Eº/V *vs.* Cp2Fe0/+ (E/mV) | |
| --- | --- | --- | --- |
| Oxidation | Reduction |
| [Ru(16-TMC)(CCpy-4)2] (**Ru**)*y* | 256 (41000), 430 (46900) | +1.00 (i), –0.40 (130, q) |  |
| [{Re(bpy)(CO)3}2**-{(4-pyCC)2Ru(16-TMC)}](OTf)2 (***a*Re2Ru**) | 250 (43900), 289 (59300), 319 (34500), 358 (sh, 11400), 516 (74300) | +1.17 (i), –0.30 (60, q) | –1.96 (i), –1.65 (i) |
| [{Re(4,4’-tBu2bpy)(CO)3}2**-{(4-pyCC)2Ru(16-TMC)}](OTf)2 (***b*Re2Ru**) | 252 (50300), 286 (61200), 317 (37500), 355 (sh, 13200), 516 (74400) | +1.40 (i), +1.16 (i),  –0.28 (50, q) | –2.10 (i), –1.67 (70, q) |
| [{Re(phen)(CO)3}2**-{(4-pyCC)2Ru(16-TMC)}](OTf)2 (***c*Re2Ru**) | 256 (57700), 277 (76400), 288 (sh, 69100), 430 (sh, 12800), 516 (77800) | +1.18 (i), –0.29 (75, q) | –2.24 (i), –1.55 (i) |

*x* Recorded at 100 mV s–1, 0.1 mole dm–3 [nBu4N][PF6] as supporting electrolyte. *y* Recorded in CH2Cl2. q = Quasi-reversible (E1/2), i = irreversible.
